# Supplementary material for: Integrating photon up- and down-conversion to produce efficient light-harvesting materials for enhancing natural photosynthesis
Source: Royal Society of Chemistry journal article supplement (doi:10.1039/d1ta04443e), 2021-01-01
Supplement: d1ta04443e1.pdf [file d1ta04443e1.pdf]

## Electronic Supplemental information

### Integrating photon up- and down-conversion to produce efficient light-harvesting materials for enhancing natural photosynthesis

Mingyue Jiang<sup>a</sup>, Yue Yuan<sup>b</sup>, Yuchen Fang<sup>a</sup>, Shouxin Liu<sup>a</sup>, Jian Li<sup>a</sup>, Zhijun Chen<sup>\*a</sup>, Qiuying Pang<sup>\*b</sup> and Shujun Li<sup>\*a</sup>

<sup>a</sup> Key Laboratory of Bio-based Material Science & Technology, Ministry of Education, Northeast Forestry University, Harbin 150040, China

<sup>b</sup> Key Laboratory of Saline-alkali Vegetation Ecology Restoration, Ministry of Education, College of Life Sciences, Northeast Forestry University, Harbin 150040, China.

\* E-mail address: [chenzhijun@nefu.edu.cn](mailto:chenzhijun@nefu.edu.cn); [qiuying@nefu.edu.cn](mailto:qiuying@nefu.edu.cn); [lishujun@nefu.edu.cn](mailto:lishujun@nefu.edu.cn);

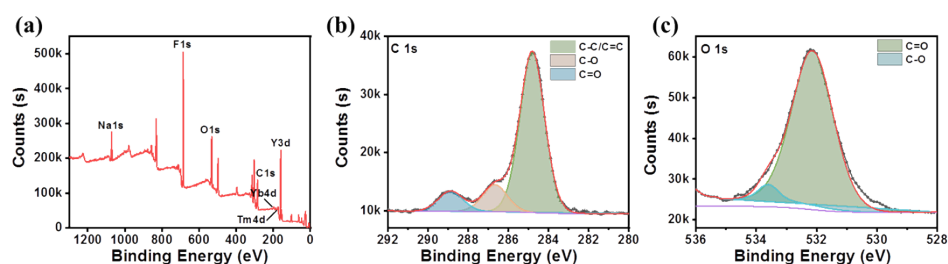

Fig. S1 X-ray photoelectron spectra of UCNPs@PAA. (a) Survey spectrum; (b) High-resolution C 1 s spectrum; (c) High-resolution O 1 s spectrum.

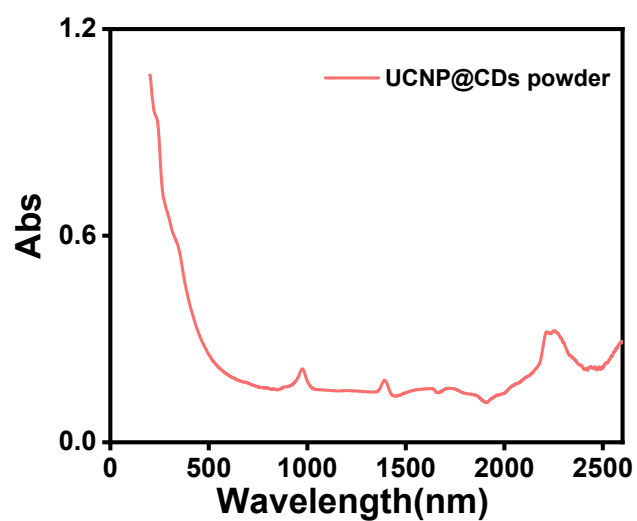

Fig. S2 Absorbance of UCNP@CDs powder.

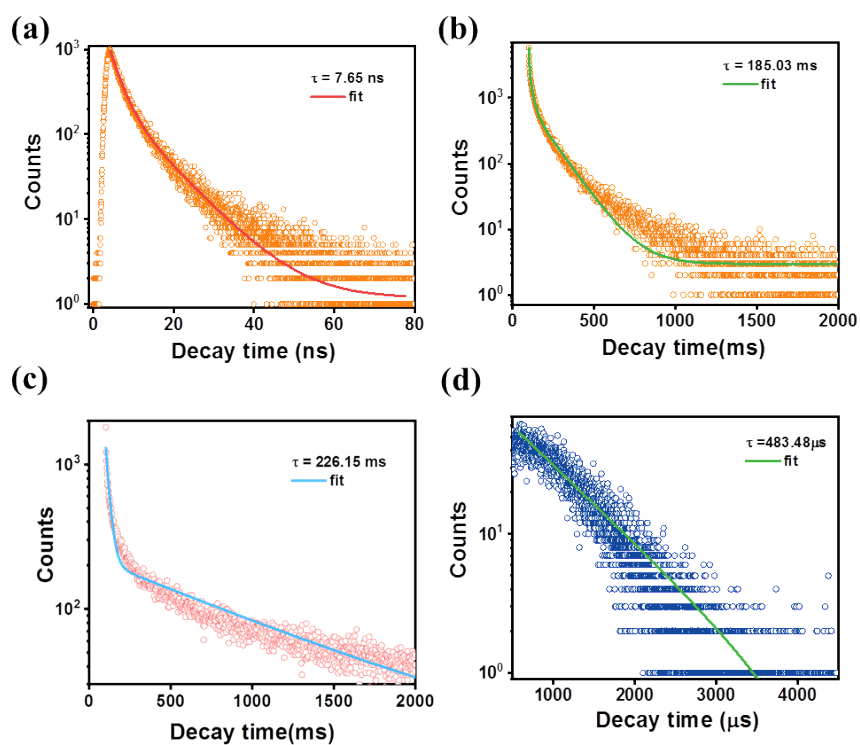

Fig. S3 Decay curves of 3.2% UCNP@CDs/CMC film. (a) Fluorescence decay curves ( $\lambda_{ex} = 365 \text{ nm}$ ); (b) Phosphorescence decay curves in air atmosphere ( $\lambda_{ex} = 365 \text{ nm}$ ); (c) Phosphorescence decay curves in nitrogen atmosphere ( $\lambda_{ex} = 365 \text{ nm}$ ); (d)

Upconversion luminescence decay curves ( $\lambda_{\text{ex}} = 976 \text{ nm}$ , monitored at  $470 \text{ nm}$ ).

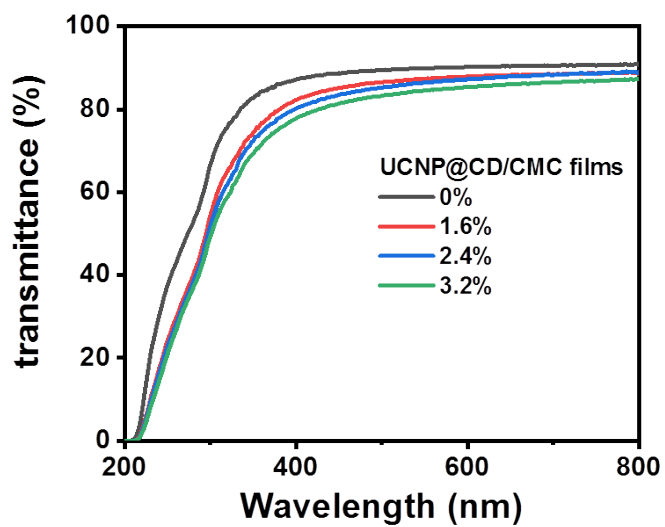

Fig. S4 Transmittance of different UCNP@CDs/CMC films.

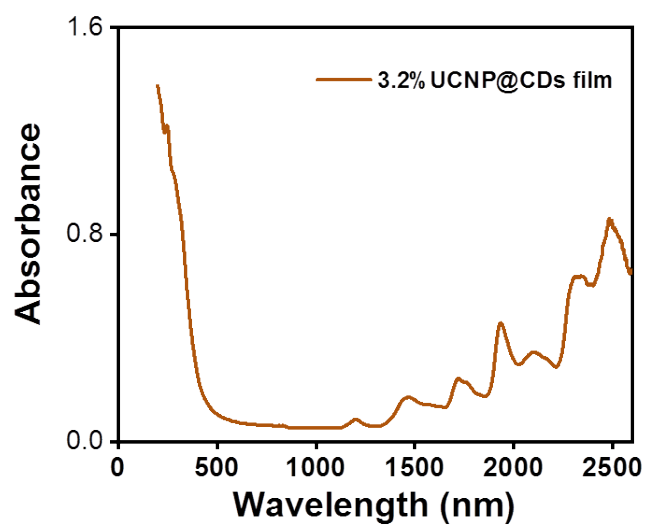

Fig. S5 Absorbance of 3.2% UCNP@CDs/CMC film

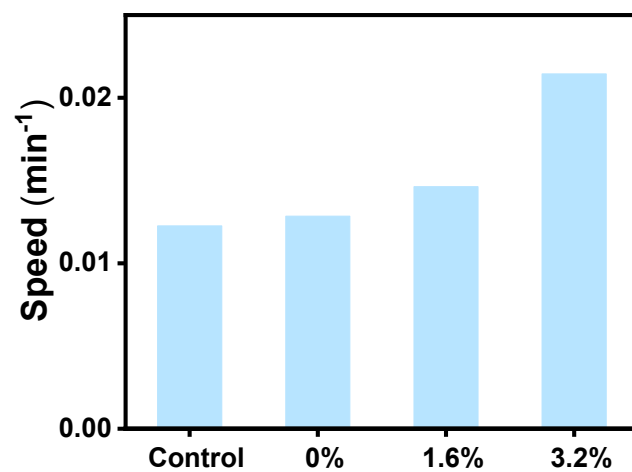

Fig. S6 Reduction speed of DCPIP by chloroplasts under different light-harvesting films

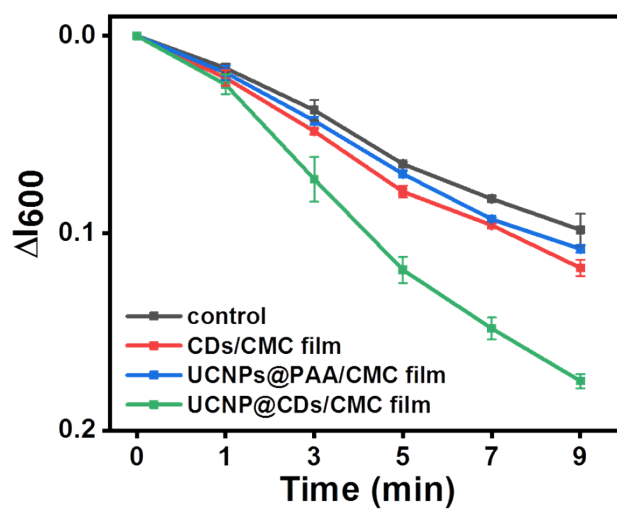

Fig. S7 Reduction of DCPIP by chloroplasts under different light-harvesting films (light intensity = 10 mW cm<sup>-2</sup>).

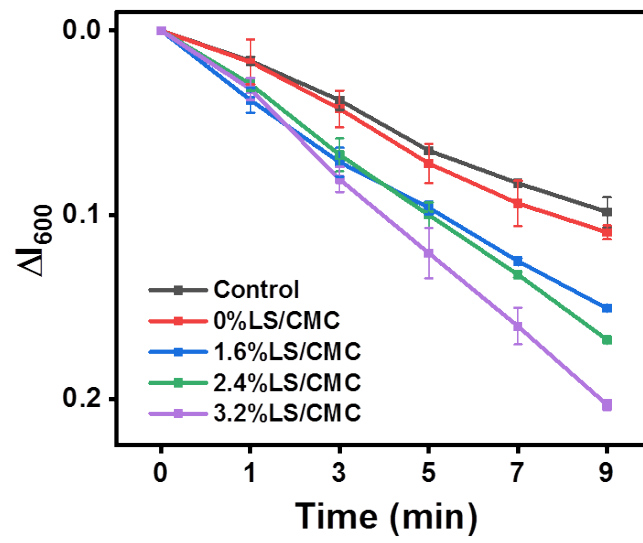

Fig. S8 Reduction of DCPIP by chloroplasts under different LS/CMC light-harvesting films (light intensity =  $10 \text{ mW cm}^{-2}$ )

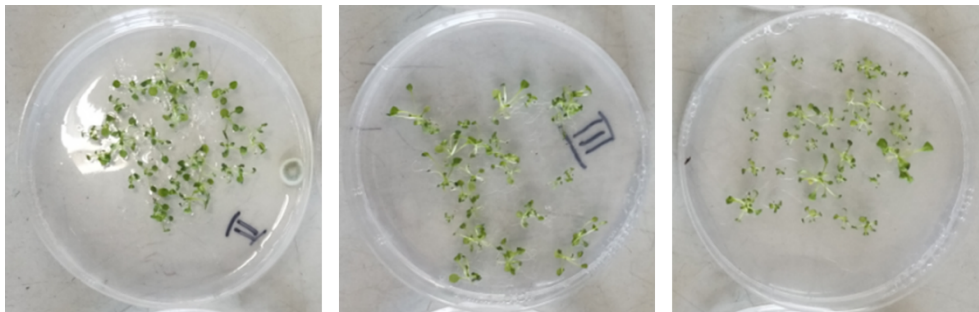

Fig. S9 Images of 2-week-old *Arabidopsis thaliana*.

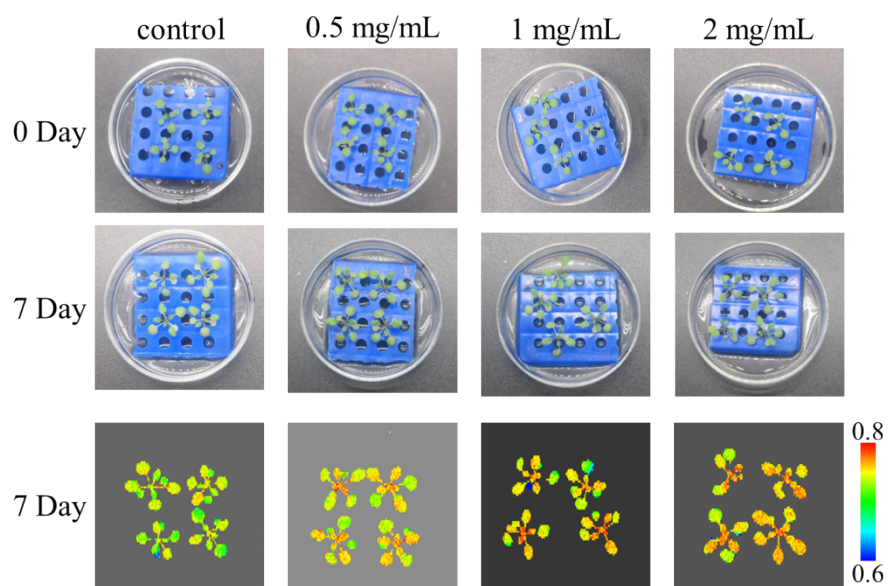

Fig. S10 Photographs and Chlorophyll fluorescence images of *Arabidopsis thaliana* incubated in different concentration UCNP@CDs aqueous solution for 0 and 7 days.
